# Supplementary material
Source: PubMed Central journal article supplement (PMC5148203)

**a.**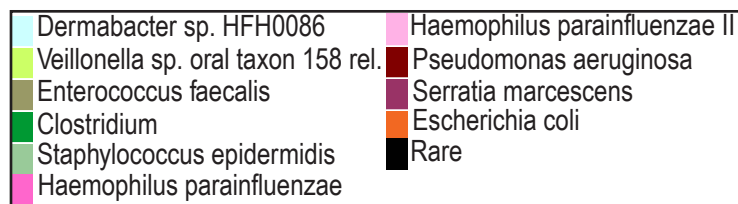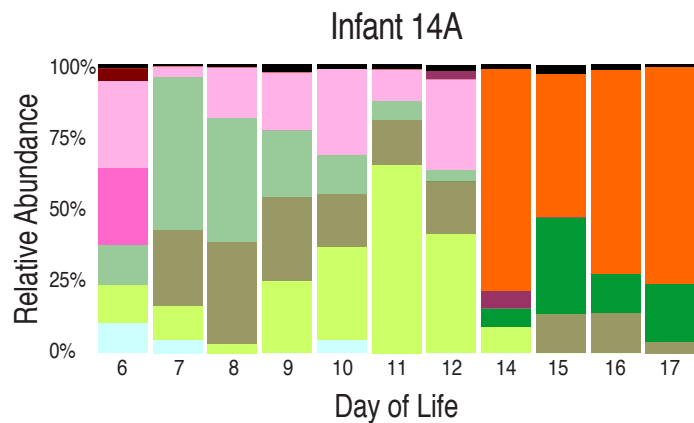**b.**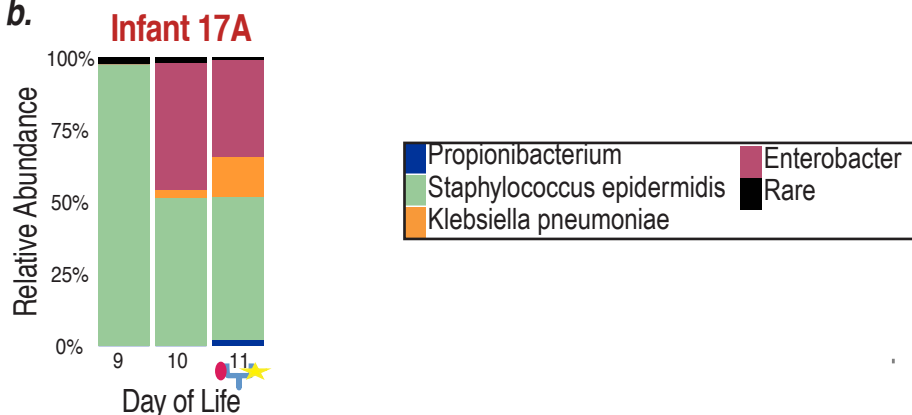**c.**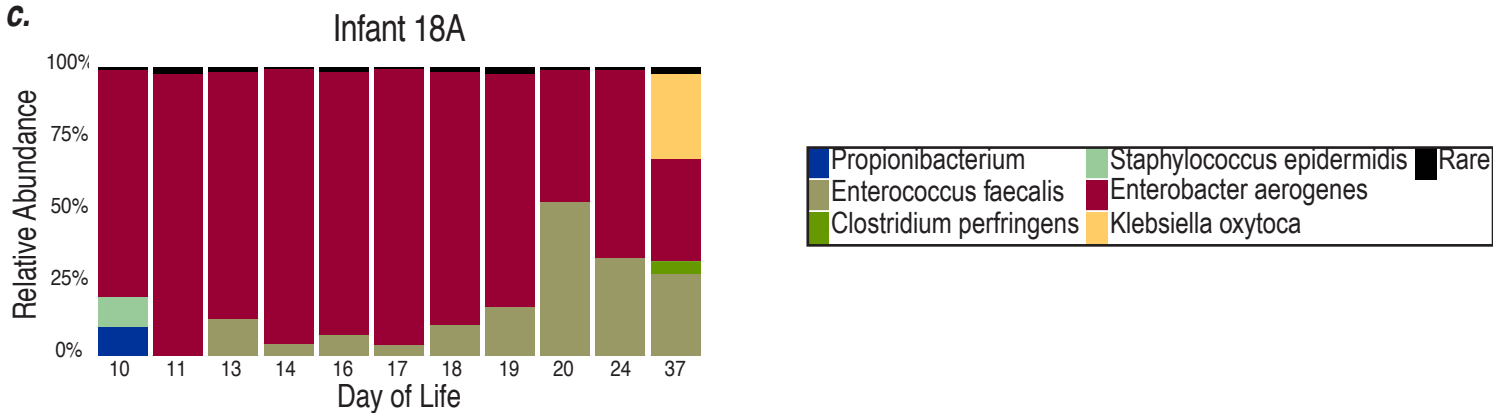**d.**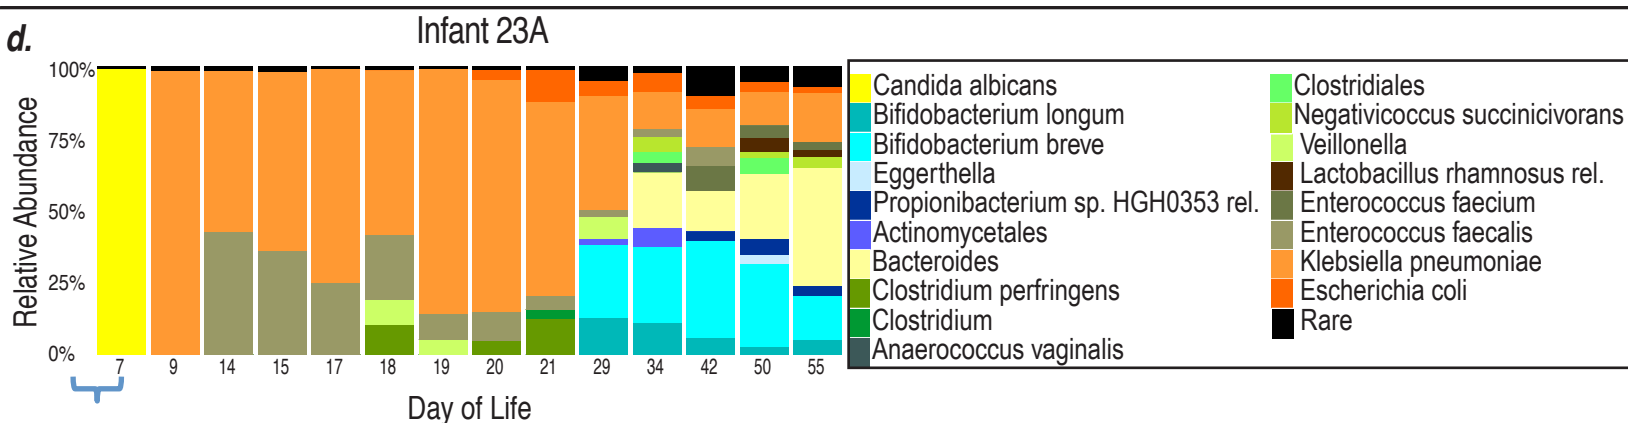

Supplement: ismej201683x3.pdf [file ismej201683x3.pdf]
